# Supplementary material for: Depicting the landscape of gut microbial-metabolic interaction and microbial-host immune heterogeneity in deficient and proficient DNA mismatch repair colorectal cancers
Source: PubMed Central journal article supplement — J Immunother Cancer. 2023 Aug 18;11(8):e007420. doi: 10.1136/jitc-2023-007420 (PMC10441105; doi:10.1136/jitc-2023-007420), 2023-08-18
Supplement: jitc-2023-007420supp006.pdf [file jitc-2023-007420supp006.pdf]

Table S1. Clinical characteristics of dMMR CRC, pMMR CRC, and healthy controls.

|                             | CTRL (n=227)  | dMMR (n=21)     | pMMR (n=207)   | Pvalue (dMMR vs pMMR) |
|-----------------------------|---------------|-----------------|----------------|-----------------------|
| Age (Mean±SD)               | 50.41 ± 13.60 | 51.67 ± 12.53   | 55.25 ± 13.00  | 0.2256                |
| Gender (%)                  |               |                 |                | 1                     |
| Female                      | 128 (56.4)    | 9 (42.9)        | 88 (42.5)      |                       |
| Male                        | 99 (43.6)     | 12 (57.1)       | 119 (57.5)     |                       |
| BMI (Mean±SD)               | 25.40 ± 3.48  | 22.78 ± 3.64    | 23.77 ± 3.24   | 0.2452                |
| Location (%)                |               |                 |                | <0.0001               |
| Right hemicolon             | N/A           | 17 (81.0)       | 43 (20.8)      |                       |
| Left hemicolon              | N/A           | 4 (19.0)        | 67 (32.4)      |                       |
| Rectum                      | N/A           | 0 (0.0)         | 97 (46.9)      |                       |
| T Stage (%)                 |               |                 |                | 1                     |
| T3                          | N/A           | 17 (81.0)       | 169 (81.6)     |                       |
| T4                          | N/A           | 4 (19.0)        | 38 (18.4)      |                       |
| Size (%)                    |               |                 |                | 0.0237                |
| <5cm                        | N/A           | 8 (38.1)        | 136 (65.7)     |                       |
| ≥5cm                        | N/A           | 13 (61.9)       | 71 (34.3)      |                       |
| Differentiation (%)         |               |                 |                | 0.0105                |
| Well-Moderate               | N/A           | 9 (42.9)        | 138 (66.7)     |                       |
| Poor                        | N/A           | 11 (52.4)       | 69 (33.3)      |                       |
| NA                          | N/A           | 1 (4.8)         | 0 (0.0)        |                       |
| Nerve Invasion (%)          |               |                 |                | 0.0484                |
| Negative                    | N/A           | 14 (66.7)       | 121 (58.5)     |                       |
| Positive                    | N/A           | 6 (28.6)        | 86 (41.5)      |                       |
| NA                          | N/A           | 1 (4.8)         | 0 (0.0)        |                       |
| Vascular Invasion (%)       |               |                 |                | 0.0628                |
| Negative                    | N/A           | 12 (57.1)       | 102 (49.3)     |                       |
| Positive                    | N/A           | 8 (38.1)        | 105 (50.7)     |                       |
| NA                          | N/A           | 1 (4.8)         | 0 (0.0)        |                       |
| CEA (ng/ml) (Mean±SD)       | N/A           | 10.43 ± 20.99   | 33.60 ± 122.03 | 0.0176                |
| CA199 (U/ml) (Mean±SD)      | N/A           | 113.97 ± 295.04 | 50.40 ± 146.09 | 0.3406                |
| KRAS/NRAS/BRAF Mutation (%) |               |                 |                | 0.1567                |
| Negative                    | N/A           | 7 (33.3)        | 108 (52.2)     |                       |
| Positive                    | N/A           | 14 (66.7)       | 99 (47.8)      |                       |
| Neoadjuvant Therapy (%)     |               |                 |                | 0.1328                |
| No                          | N/A           | 18 (85.7)       | 139 (67.1)     |                       |
| Yes                         | N/A           | 3 (14.3)        | 68 (32.9)      |                       |

Abbreviations: CRC, colorectal cancer; dMMR CRC, deficient DNA mismatch repair CRC; pMMR CRC, proficient DNA mismatch repair CRC; CTRL, enrolled healthy controls; SD, standard deviation; N/A, not available. P values calculated by Student's t test or Pearson's Chi-square test. P < 0.05 is considered statistically significant.
