# Supplementary figures and images for: Depicting the landscape of gut microbial-metabolic interaction and microbial-host immune heterogeneity in deficient and proficient DNA mismatch repair colorectal cancers
Source: PubMed Central journal article supplement — J Immunother Cancer. 2023 Aug 18;11(8):e007420. doi: 10.1136/jitc-2023-007420 (PMC10441105; doi:10.1136/jitc-2023-007420), 2023-08-18

Figure S1

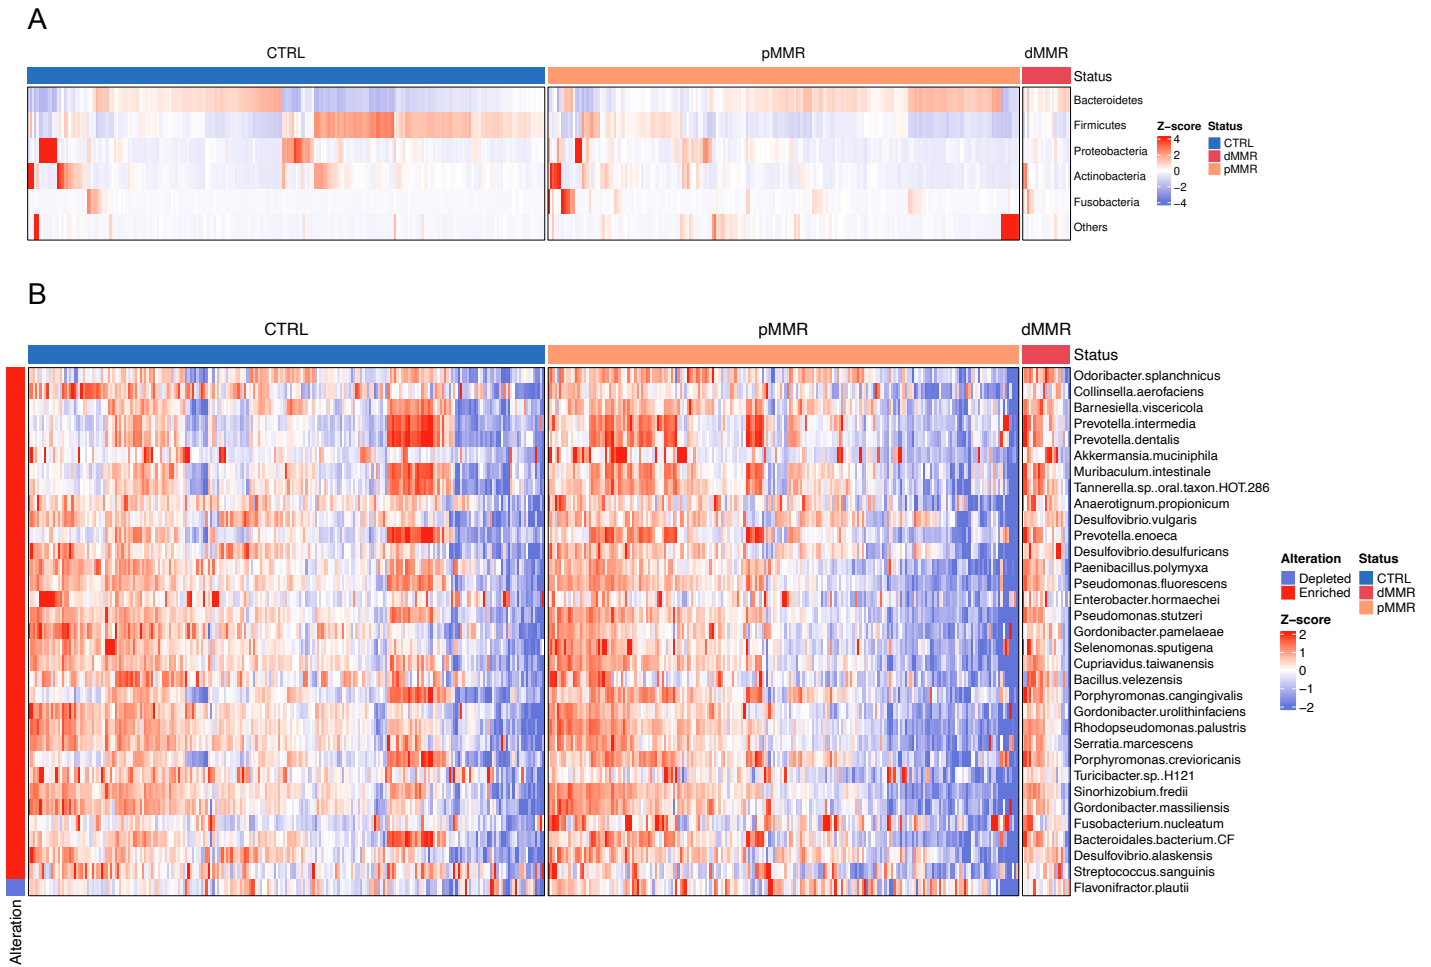

Supplement: jitc-2023-007420supp002.pdf [file jitc-2023-007420supp002.pdf]

Figure S2

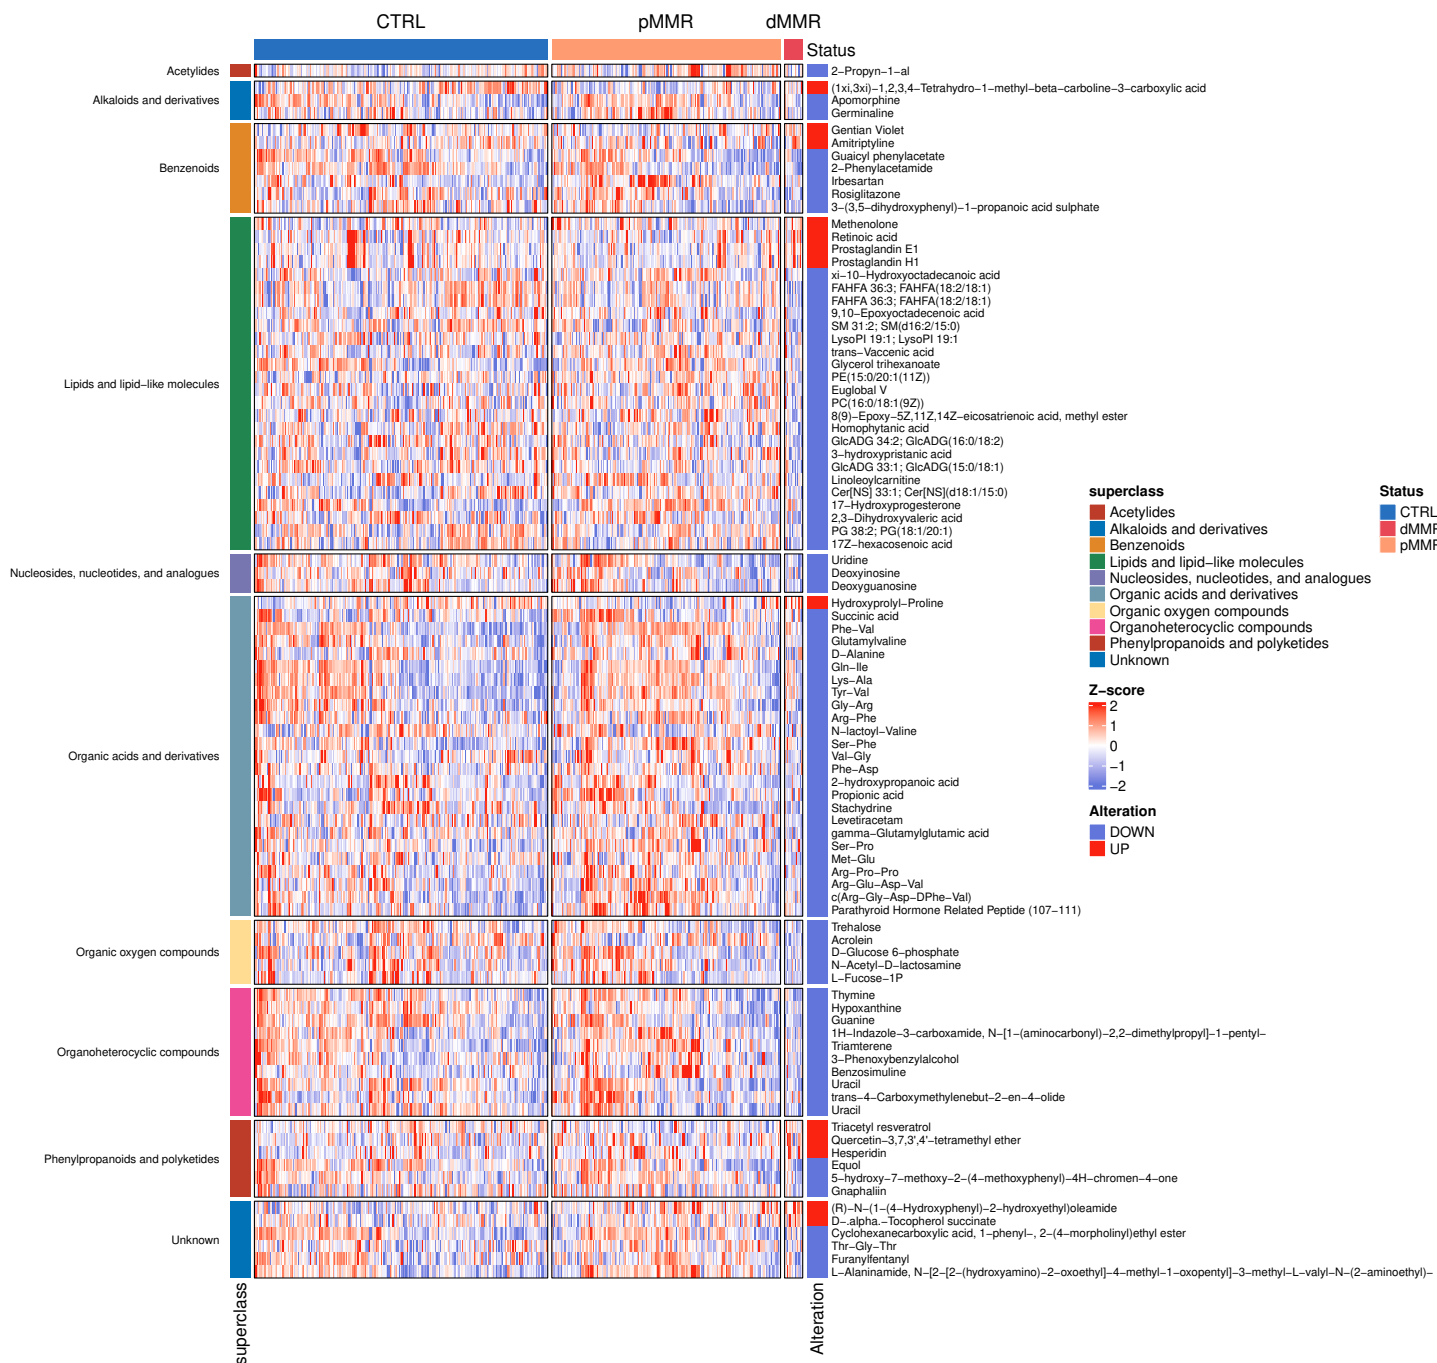

Supplement: jitc-2023-007420supp003.pdf [file jitc-2023-007420supp003.pdf]

Figure S3

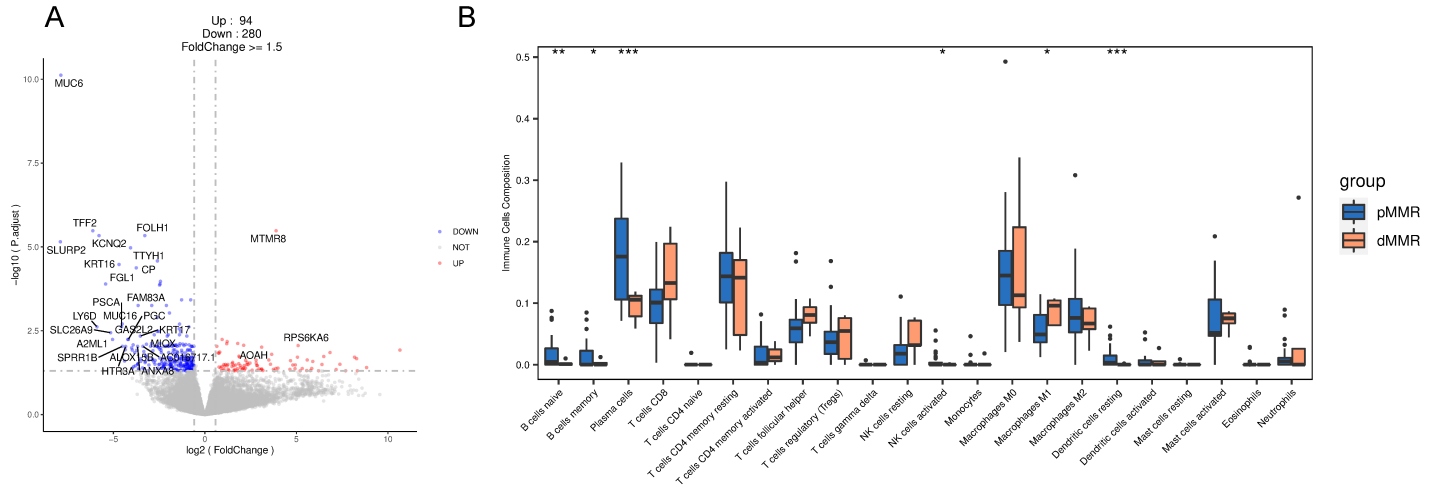

Supplement: jitc-2023-007420supp004.pdf [file jitc-2023-007420supp004.pdf]
